# Supplementary material for: Effects of dexmedetomidine on A549 non-small cell lung cancer growth in a clinically relevant surgical xenograft model
Source: PubMed Central journal article supplement (PMC10393998; doi:10.1038/s41598-023-39704-3), 2023-08-01
Supplement: 41598_2023_39704_MOESM1_ESM.pdf [file 41598_2023_39704_MOESM1_ESM.pdf]

## Supplementary information

*Article title:* Effects of dexmedetomidine on human non-small cell lung cancer growth  
in a clinically relevant surgical xenograft model

*Journal name:* Scientific Reports

*Author names:* Ji Hae Jun, Jae-Kwang Shim, Ju Eun Oh, Kwang-Sub Kim, Young-Lan Kwak,  
and Sarah Soh

*Correspondence:* Sarah Soh, MD, Ph.D.

E-mail: yeonchoo@yuhs.ac

Department of Anaesthesiology and Pain Medicine, Yonsei University College of Medicine, 50  
Yonsei-ro, Seodaemun-gu, Seoul 03722, Republic of Korea

Telephone: 82-2-2228-8500

Fax: 82-2-364-2951

ORCID ID: 0000-0001-5022-4617

### SUPPLEMENTARY TABLES

|                              |   |
|------------------------------|---|
| Supplementary Table S1 ..... | 2 |
| Supplementary Figure S1..... | 3 |

**Supplementary Table S1.** The primers for quantitative polymerase chain reaction (qPCR) assay

| Gene  | Primer names | Primer sequence (5' to 3') |
|-------|--------------|----------------------------|
| IL-10 | Forward      | GGTGAGAAGCTGAAGACCCT       |
| IL-10 | Reverse      | ACACCTTGGTCTTGGAGCTT       |
| IL-18 | Forward      | GGACACTTTCTTGCTTGCCA       |
| IL-18 | Reverse      | ACCCTCCCCACCTAACTTTG       |
| GAPDH | Forward      | CTGGAGAAACCTGCCAAGTA       |
| GAPDH | Reverse      | AGACAACCTGGTCCTCAGTG       |

**Supplementary Figure S1.** Original images of Western blot (Fig 5)

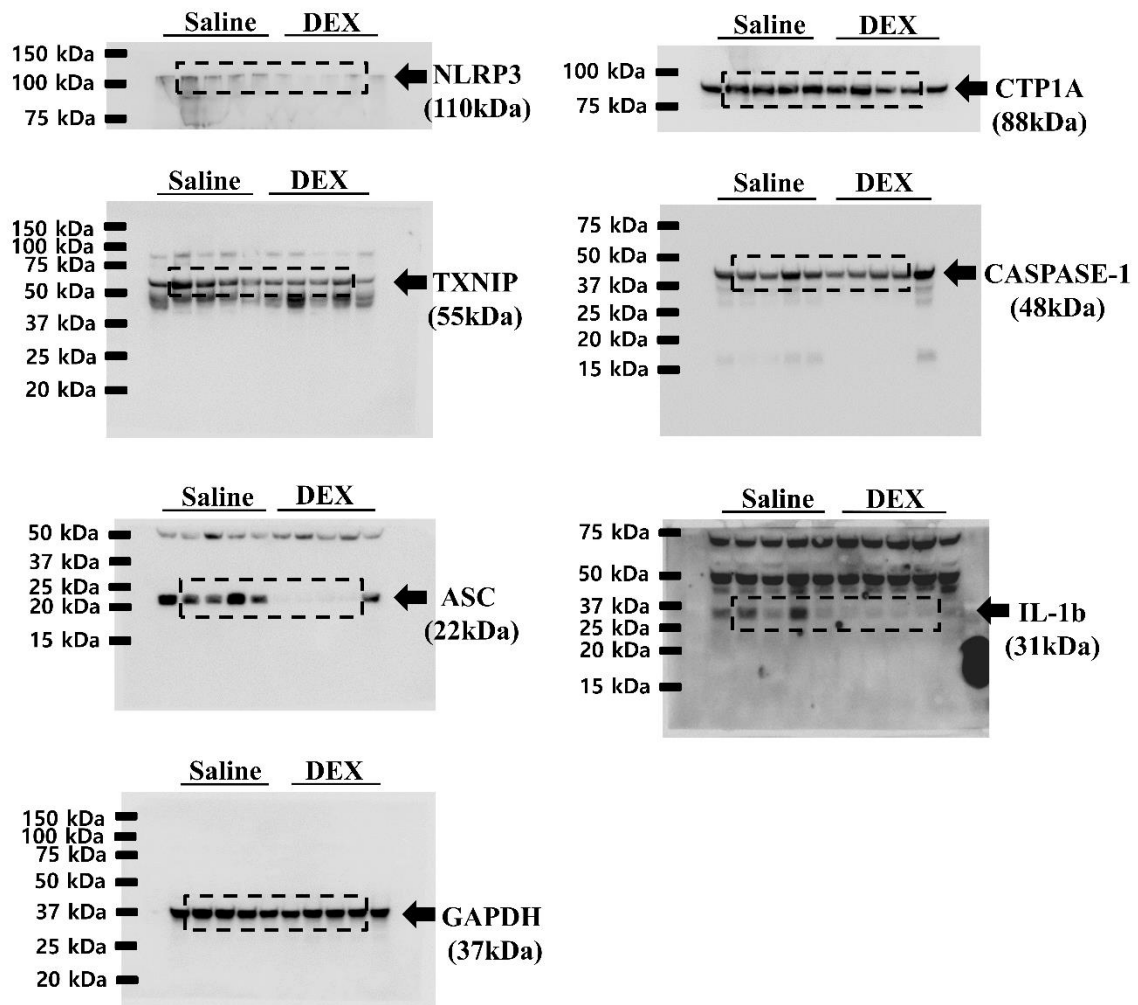

Lanes 1 to 5 correspond to samples from the A549-luc-saline group, and lanes 6 to 10 correspond to samples from the A549-luc-DEX group. Some membranes were cut prior to hybridization with antibodies. Lanes 2 to 9 (the dotted squares) are shown in the manuscript for publication.
